# Supplementary material for: Deciphering the Role of Pyrvinium Pamoate in the Generation of Integrated Stress Response and Modulation of Mitochondrial Function in Myeloid Leukemia Cells through Transcriptome Analysis
Source: MDPI journal article supplement (doi:10.3390/biomedicines9121869), 2021-12-09
Supplement: s1 [file s1]

## Supplementary Information

### Supplementary Figure

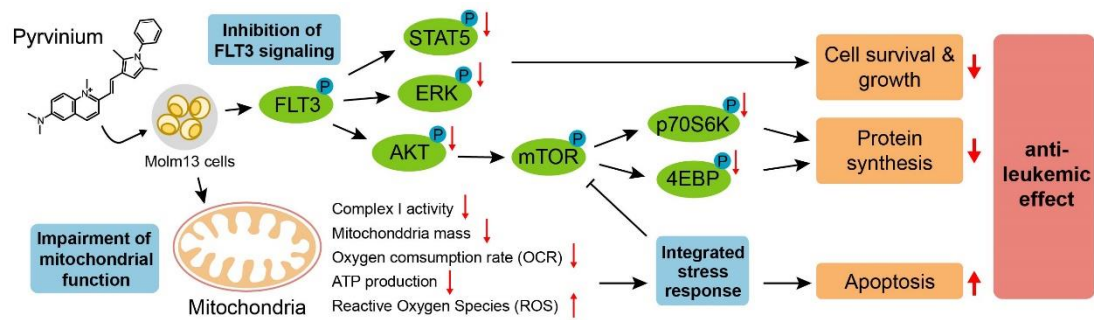

### Supplementary Figure S1

#### Schematic overview of the mechanisms underlying the anti-leukemic activity of pyrvinium in Molm13 myeloid leukemia cells.

Pyrvinium inhibits FLT3 downstream signaling pathways, including the AKT, ERK, and STAT5 signaling pathways. In addition, pyrvinium targets mitochondria and inhibits mitochondrial energy functions, thus inducing cellular stress responses. These effects finally inhibit cell proliferation and induce apoptosis.

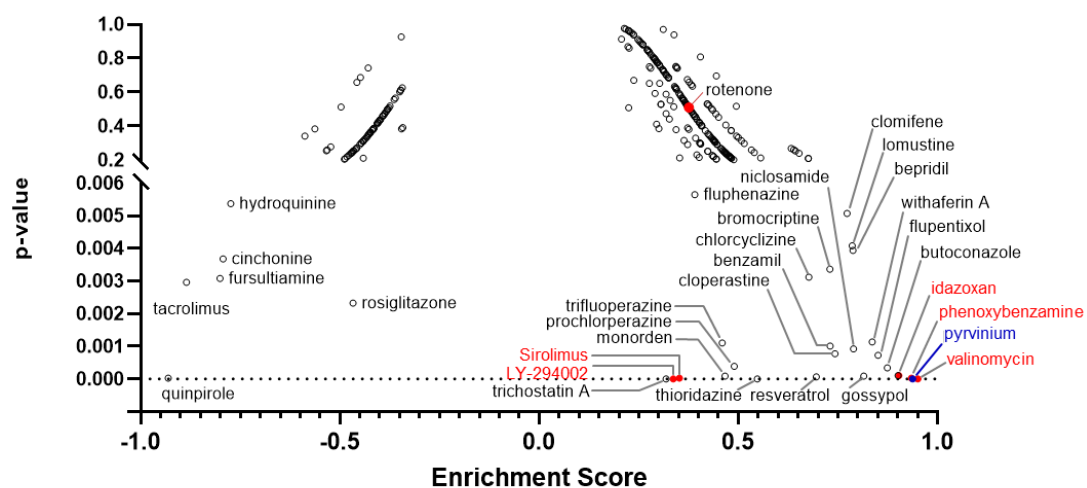

## Supplementary Figure S2

Chemical screening by connectivity map (build02) to identify molecules influencing gene expression in a similar manner to pyrvinium treated Molm13 cells.

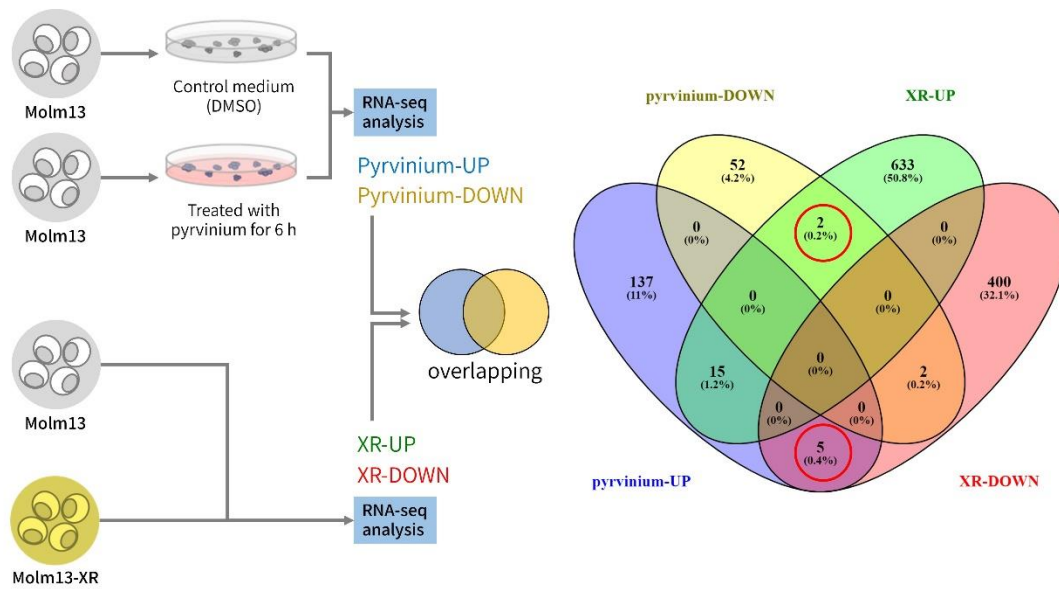

### Supplementary Figure S3

Comparison of DEGs between transcriptomics from pyrvinium-treated Molm13 cells (pyrvinium) and those from cabozantinib-resistant (XR) cells by Venny 2.1 (<https://bioinfogp.cnb.csic.es/tools/venny/index.html>) [1].

## Supplementary Table

### Supplementary Table S1

Primary antibodies used in this research.

| Product                                   | Brand          | Catalog no. #      | Source |
|-------------------------------------------|----------------|--------------------|--------|
| Phospho-FLT3 (Tyr589/Tyr591)              | Cell Signaling | #3464              | Rabbit |
| FLT3                                      | Santa Cruz     | Sc-479             | Mouse  |
| Phospho-mTOR (Ser2448)                    | Cell Signaling | #2971              | Rabbit |
| mTOR                                      | Cell Signaling | #2972              | Rabbit |
| Phospho-STAT3 (Tyr705)                    | Cell Signaling | #9131              | Rabbit |
| STAT3                                     | Cell Signaling | #12640             | Rabbit |
| Phospho-STAT5 (Tyr694)                    | Genetex        | GTX61079           | Rabbit |
| STAT5                                     | Genetex        | GTX61098           | Rabbit |
| Phospho-AKT(Ser473)                       | Cell Signaling | #4058              | Rabbit |
| AKT                                       | Cell Signaling | #9272              | Rabbit |
| Phospho-p44/42 ERK 1/2<br>(Thr202/Tyr204) | Cell Signaling | #4370              | Rabbit |
| p44/42 ERK1/2                             | Cell Signaling | #4695              | Rabbit |
| $\alpha$ -tubulin                         | Genetex        | GTX628802          | Mouse  |
| $\beta$ -actin                            | Genetex        | GTX109639          | Rabbit |
| Cyclin E1                                 | Cell Signaling | #4129              | Mouse  |
| PUMA                                      | Cell Signaling | #4976              | Rabbit |
| Phospho-p70 S6K (Thr389)                  | Cell signaling | #9205              | Rabbit |
| p70 S6 Kinase                             | Cell Signaling | #2708              | Rabbit |
| Phospho-4E-BP1 (Thr37/46)                 | Cell Signaling | #2855              | Rabbit |
| 4E-BP1                                    | Cell Signaling | #9644              | Rabbit |
| Phospho-GSK-3-beta (Ser9)                 | Cell signaling | #9322              | Rabbit |
| GSK-3 $\beta$                             | Cell signaling | #9315              | Rabbit |
| Phospho-PERK (T980)                       | Cell signaling | #3179              | Rabbit |
| PERK                                      | Proteintech    | 20582-1-AP         | Rabbit |
| Phospho-eIF2 $\alpha$ (Ser51)             | ABclonal       | AP0635             | Rabbit |
| eIF2 $\alpha$ (EIF2S1/EIF2A)              | Proteintech    | 11170-1-AP         | Rabbit |
| ATF4                                      | Proteintech    | 10835-1-AP         | Rabbit |
| Phospho-GCN2 (T899)                       | CUSABIO        | CSB-PA010224       | Rabbit |
| GCN2                                      | CUSABIO        | CSB-PA868396ESR2HU | Rabbit |

**Supplementary Table S2**

Primer sequences of quantitative reverse transcription-PCR

| Gene                                     | Forward primer (5'-3')  | Reverse primer (5'-3')    |
|------------------------------------------|-------------------------|---------------------------|
| <b>Cell responses to stress stimulus</b> |                         |                           |
| <i>ATF4</i>                              | TGGCTGGCTGTGGATGG       | TCCCGGAGAAGGCATCCT        |
| <i>SESN2</i>                             | CCTCTGGGCGAGTAGACAAC    | GGAGCCTACCAGGTAAGAACA     |
| <i>PCK2</i>                              | GCCATCATGCCGTAGCATC     | AGCCTCAGTTCCATCACAGAT     |
| <i>DDIT4</i>                             | TGAGGATGAACACTTGTGTGC   | CCAACTGGCTAGGCATCAGC      |
| <b>Redox balance</b>                     |                         |                           |
| <i>CTH</i>                               | CATGAGTTGGTGAAGCGTCAG   | AGCTCTCGGCCAGAGTAAATA     |
| <i>CHAC1</i>                             | GAACCCTGGTTACCTGGGC     | CGCAGCAAGTATTCAAGGTTGT    |
| <b>Amino acid metabolism</b>             |                         |                           |
| <i>ASNS</i>                              | GGAAGACAGCCCCGATTACT    | AGCACGAACTGTTGTAATGTCA    |
| <i>GPT2</i>                              | GTGATGGCACTATGCACCTAC   | TTCACGGATGCAGTTGACACC     |
| <i>PSAT1</i>                             | TGCCGCACTCAGTGTTGTTAG   | GCAATTCCCGCACAAAGATTCT    |
| <i>SLC7A11</i>                           | GCGTGGGCATGTCTCTGAC     | GCTGGTAATGGACCAAAGACTTC   |
| <i>SLC6A9</i>                            | CAGATCGAGTTTGTACTGACGAG | GCGATAGCAGAGGTATGGGAAG    |
| <b>One carbon cycle</b>                  |                         |                           |
| <i>ALDH1L2</i>                           | TAGTCCAAAGCACGGCTCTAT   | GGTCCTGTATCCAAGCCATCA     |
| <b>Protein folding modulation</b>        |                         |                           |
| <i>HSP90B1</i>                           | CCAGTTTGGTGTCGGTTTCTAT  | CTGGGTATCGTTGTTGTGTTTTG   |
| <i>HSPA5</i>                             | GAAAGAAGGTTACCCATGCAGT  | CAGGCCATAAGCAATAGCAGC     |
| <i>HSPH1</i>                             | CCGGAAAGATGAACAGGTCAC   | GTGTAGCGCCTCCAACAATC      |
| <i>DNAJA1</i>                            | ACTGGAGCCAGGCGATATTAT   | CTTCAACGAGCTGTATGTCCAT    |
| <b>ATP synthesis</b>                     |                         |                           |
| <i>MT-ND5</i>                            | ATCGGTTTCATCCTCGCCTT    | AGTCAGGGGTGGAGACCTAA      |
| <i>MT-COX3</i>                           | ACCAATGATGGCGCGATGTA    | GGCTGGAGTGGTAAAAGGCT      |
| <b>Apoptosis</b>                         |                         |                           |
| <i>DDIT3</i>                             | AAGGCACTGAGCGTATCATGT   | TGAAGATACACTTCCTTCTTGAACA |
| <i>BBC3</i>                              | GACCTCAACGCACAGTACGAG   | AGGAGTCCCATGATGAGATTGT    |
| <i>PMAIP1</i>                            | CTGGAAGTCGAGTGTGCTACT   | TCAGGTTCTTGAGCAGAAGAG     |
| <i>TRIB3</i>                             | AAGCGGTTGGAGTTGGATGAC   | CACGATCTGGAGCAGTAGGTG     |
| <b>Internal control</b>                  |                         |                           |
| <i>18S rRNA</i>                          | GTAACCCGTTGAACCCCAT     | CCATCCAATCGGTAGTAGCG      |

### Supplementary Table S3

List of upregulated and downregulated genes after 100 nM pyrvinium treatment for 6 h

| Name                                     | Gene symbol                       | p-value* | Fold change | pyrvinium-treated** | Control-DMSO** |
|------------------------------------------|-----------------------------------|----------|-------------|---------------------|----------------|
| <b>Upregulated DEGs</b>                  |                                   |          |             |                     |                |
| <b>Cell responses to stress stimulus</b> |                                   |          |             |                     |                |
|                                          | <i>SESN2</i>                      | 0        | 3.27        | 1998.65             | 610.01         |
|                                          | <i>PCK2</i>                       | 6.18E-12 | 2.32        | 4914.99             | 2119.79        |
| <b>Redox balance</b>                     |                                   |          |             |                     |                |
|                                          | <i>CTH</i>                        | 0        | 3.68        | 903.92              | 245.02         |
|                                          | <i>CHAC1</i>                      | 0        | 4.18        | 375.73              | 89.47          |
| <b>Amino acid metabolism</b>             |                                   |          |             |                     |                |
|                                          | <i>ASNS</i>                       | 2.22E-16 | 2.62        | 5756.94             | 2198.07        |
|                                          | <i>GPT2</i>                       | 1.79E-05 | 1.86        | 3726.82             | 2003.89        |
|                                          | <i>PSAT1</i>                      | 5.08E-08 | 2.03        | 19022.60            | 9367.74        |
|                                          | <i>SLC7A1</i>                     | 0.006459 | 1.66        | 11107.67            | 6686.74        |
|                                          | <i>SLC3A2</i>                     | 0.015841 | 1.63        | 10313.91            | 6327.85        |
| <b>downregulated DEGs</b>                |                                   |          |             |                     |                |
| <b>Protein folding modulation</b>        |                                   |          |             |                     |                |
|                                          | <i>HSP90B1</i>                    | 0.053825 | 0.63        | 16575.44            | 26465.33       |
|                                          | <i>HSPA5</i>                      | 1.54E-05 | 0.54        | 9924.41             | 18403.02       |
|                                          | <i>HSPA8</i>                      | 0.010537 | 0.60        | 67141.73            | 112471.82      |
|                                          | <i>HSPH1</i>                      | 4.68E-05 | 0.55        | 11466.68            | 20886.78       |
|                                          | <i>DNAJA1</i><br>( <i>HSPF4</i> ) | 7.37E-05 | 0.55        | 7144.79             | 12887.50       |
| <b>ATP synthesis</b>                     |                                   |          |             |                     |                |
|                                          | MT-ND5                            | 2.83E-11 | 0.44        | 34307.57            | 77322.98       |
|                                          | MT-COX3                           | 1.77E-06 | 0.51        | 89840.98            | 174974.58      |

\* “PPEE” were used as corrected p-values

\*\* The value of “Cabozantinib-treated” and the “Control-DMSO” were obtained from the output of EBseq to calculate the differentially expression (DE), and represented the mean of each transcript within each condition (adjusted by normalization factors).

# Supplementary Table S4

Candidate list of molecules from connectivity map analysis

| compound name    | Enrichment score | P-value | specificity | percent non-null | mean   | n   |
|------------------|------------------|---------|-------------|------------------|--------|-----|
| valinomycin      | 0.951            | 0       | 0.0116      | 100              | 0.674  | 4   |
| pyrvinium        | 0.938            | 0       | 0.0046      | 100              | 0.727  | 6   |
| phenoxybenzamine | 0.935            | 0.00002 | 0.1386      | 100              | 0.596  | 4   |
| idazoxan         | 0.903            | 0.0001  | 0           | 100              | 0.551  | 4   |
| phenazopyridine  | 0.901            | 0.0001  | 0.0065      | 100              | 0.646  | 4   |
| butoconazole     | 0.874            | 0.00034 | 0           | 100              | 0.569  | 4   |
| flupentixol      | 0.851            | 0.00072 | 0           | 100              | 0.588  | 4   |
| withaferin A     | 0.836            | 0.00113 | 0.1         | 100              | 0.602  | 4   |
| gossypol         | 0.815            | 0.00008 | 0           | 83               | 0.625  | 6   |
| niclosamide      | 0.789            | 0.00092 | 0.0105      | 100              | 0.496  | 5   |
| bepiridil        | 0.788            | 0.00394 | 0.0444      | 100              | 0.587  | 4   |
| lomustine        | 0.786            | 0.00408 | 0.0882      | 100              | 0.472  | 4   |
| clomifene        | 0.773            | 0.00507 | 0.0402      | 100              | 0.509  | 4   |
| cloperastine     | 0.743            | 0.00077 | 0.0052      | 100              | 0.499  | 6   |
| benzamil         | 0.731            | 0.00101 | 0.0191      | 83               | 0.57   | 6   |
| bromocriptine    | 0.73             | 0.00336 | 0           | 100              | 0.494  | 5   |
| resveratrol      | 0.696            | 0.00006 | 0.0931      | 77               | 0.494  | 9   |
| chlorcyclizine   | 0.677            | 0.00312 | 0.015       | 100              | 0.492  | 6   |
| thioridazine     | 0.548            | 0       | 0.1918      | 65               | 0.386  | 20  |
| prochlorperazine | 0.49             | 0.00038 | 0.1553      | 56               | 0.275  | 16  |
| monorden         | 0.467            | 0.00008 | 0.0642      | 72               | 0.307  | 22  |
| trifluoperazine  | 0.46             | 0.0011  | 0.2885      | 62               | 0.367  | 16  |
| fluphenazine     | 0.391            | 0.00565 | 0.2798      | 55               | 0.285  | 18  |
| sirolimus        | 0.352            | 0.00002 | 0.2048      | 63               | 0.267  | 44  |
| LY-294002        | 0.337            | 0       | 0.2617      | 55               | 0.299  | 61  |
| trichostatin A   | 0.319            | 0       | 0.6825      | 63               | 0.217  | 182 |
| rosiglitazone    | -0.467           | 0.00232 | 0.0124      | 57               | -0.249 | 14  |
| hydroquinine     | -0.774           | 0.00537 | 0.0142      | 75               | -0.291 | 4   |
| cinchonine       | -0.793           | 0.00368 | 0.0556      | 75               | -0.343 | 4   |
| fursultiamine    | -0.801           | 0.00308 | 0.0051      | 50               | -0.311 | 4   |
| quinpirole       | -0.931           | 0.00002 | 0           | 100              | -0.592 | 4   |

## Supplementary Methods

### Connectivity map (build02)

Briefly, the DEGs identified in our transcriptome were converted in microarray probe ID in Affymetrix HG U133A by ensembl Biomart conversion tools [2] (<http://uswest.ensembl.org/biomart/martview>). The converted pro ID were reversely queried to the connectivity map [3, 4] (version build 02, <https://portals.broadinstitute.org/cmap/>), and the results were output by form of permuted results. For selection, criteria of 1) the number of repeat experiments to more than 4 times ( $n \geq 4$ ), 2) the proportion of effective rate to  $\geq 50\%$  (percent  $\geq 50$ ), and 3)  $P\text{-value} \leq 0.05$  were applied. Compound were then arranged by their enrichment score in descending order (Supplementary Table S4).

### Supplementary Reference

1. JC O. Venny. An interactive tool for comparing lists with Venn's diagrams. 2007-2015.
2. Howe KL, Achuthan P, Allen J, Allen J, Alvarez-Jarreta J, Amode MR, et al. Ensembl 2021. Nucleic acids research. 2021;49(D1):D884-d91.
3. Lamb J, Crawford ED, Peck D, Modell JW, Blat IC, Wrobel MJ, et al. The Connectivity Map: using gene-expression signatures to connect small molecules, genes, and disease. Science (New York, NY). 2006;313(5795):1929-35.
4. Lamb J. The Connectivity Map: a new tool for biomedical research. Nature reviews Cancer. 2007;7(1):54-60.
